# Supplementary material
Source: ML conference proceedings conference paper supplement (https://openreview.net/forum?id=TBWhdZUOwO)

Environment 3: Goal 3

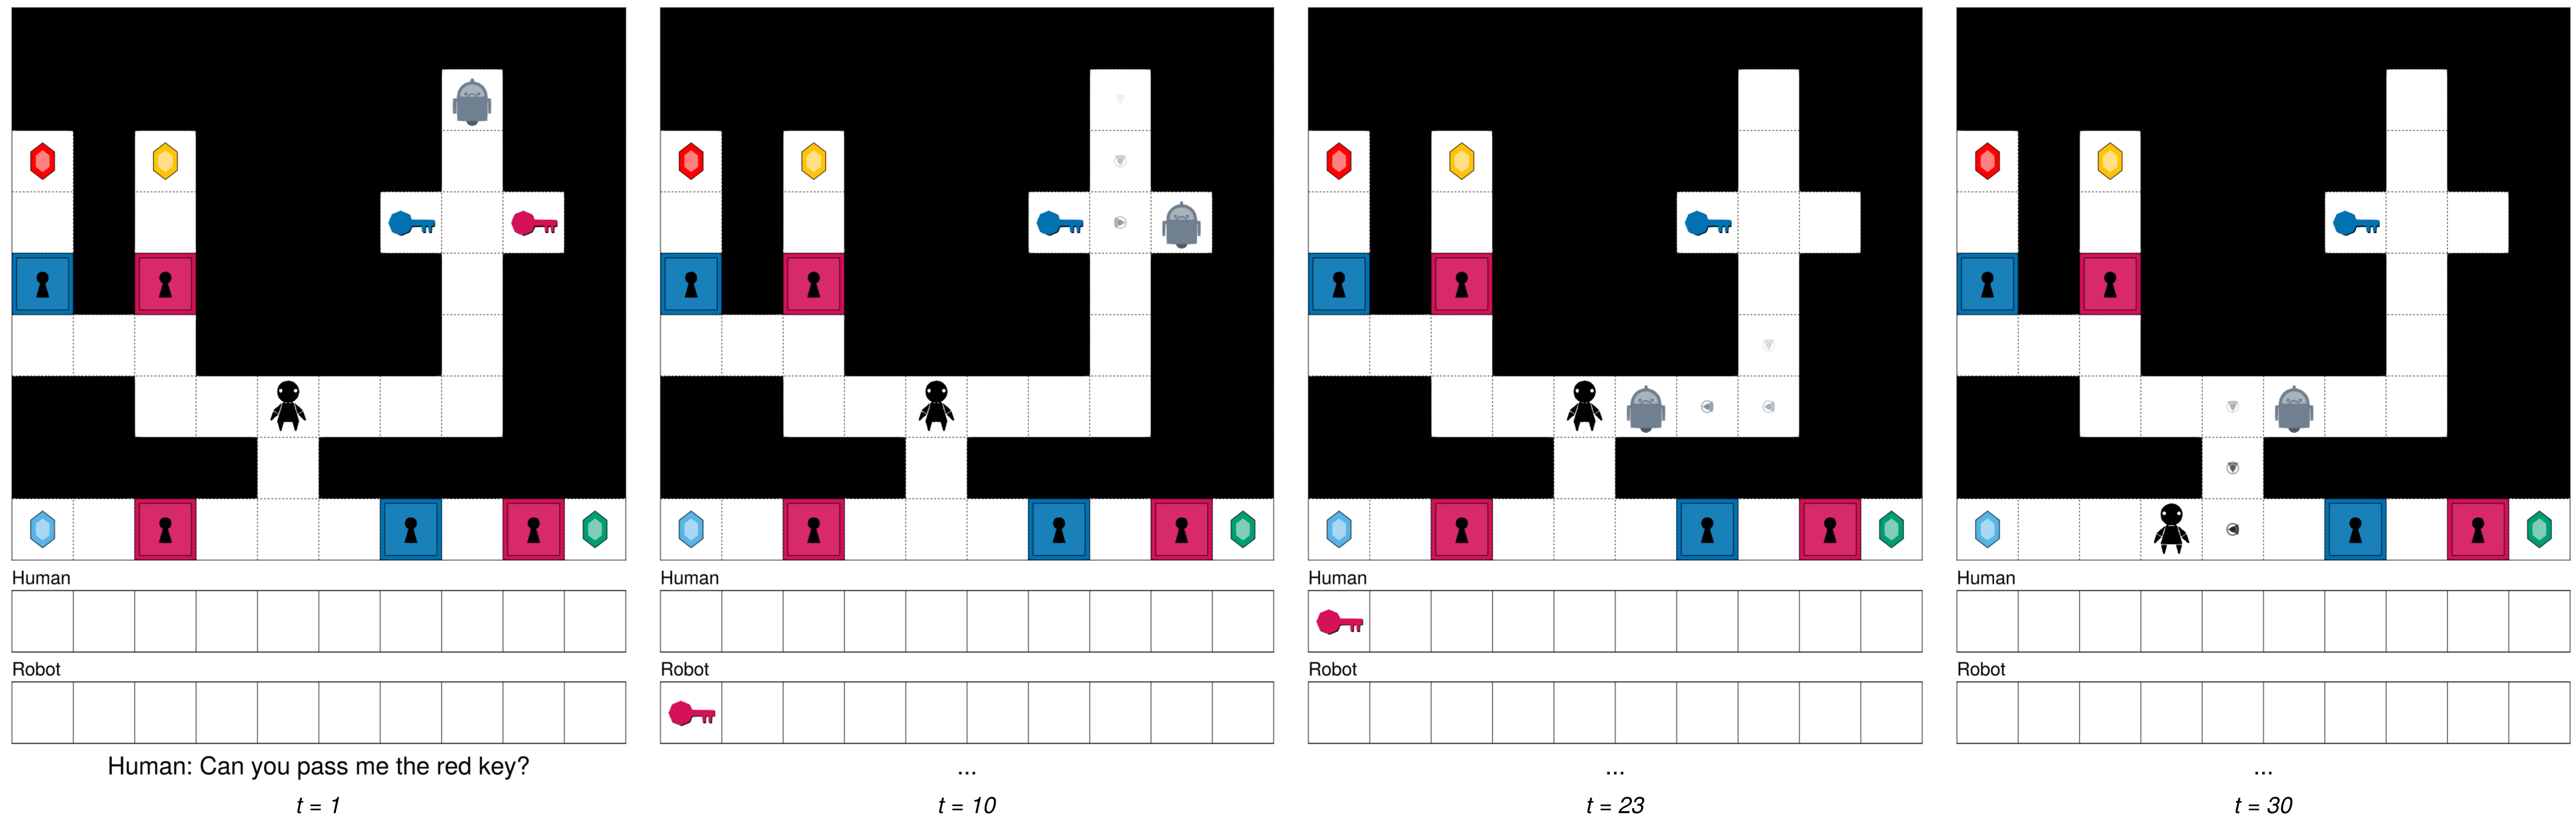

Human Inferences (Actions & Instructions)

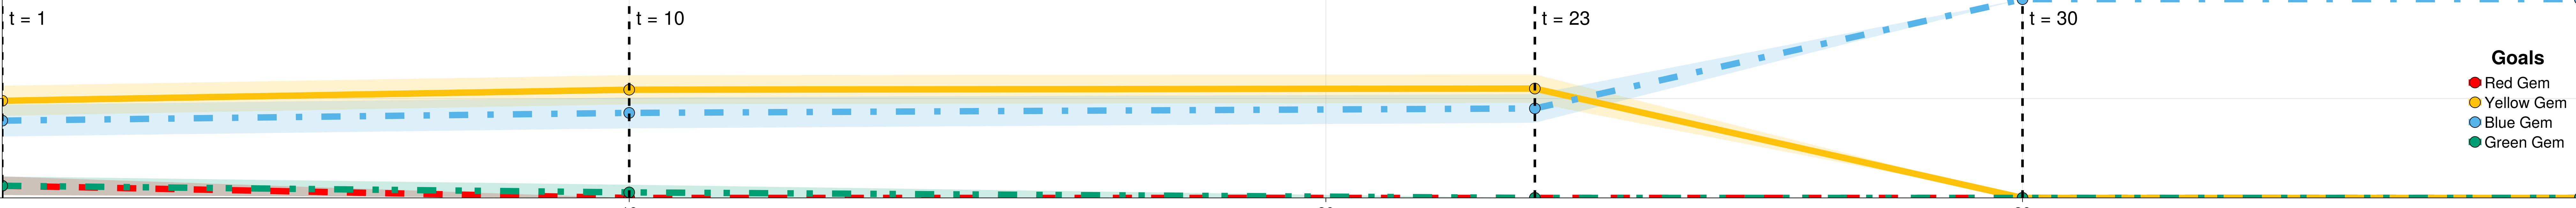

Model Inferences (Actions & Instructions)

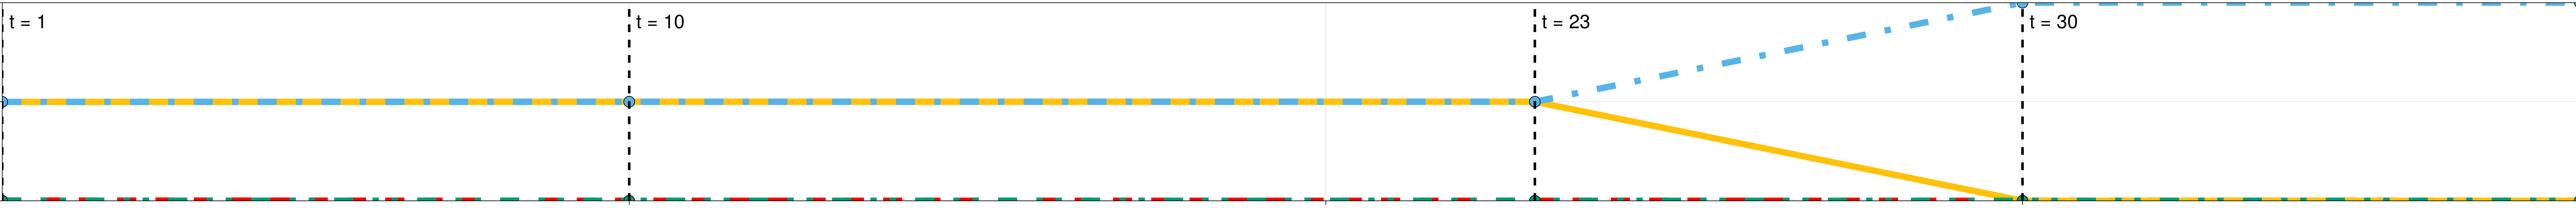

Human Inferences (Actions Only)

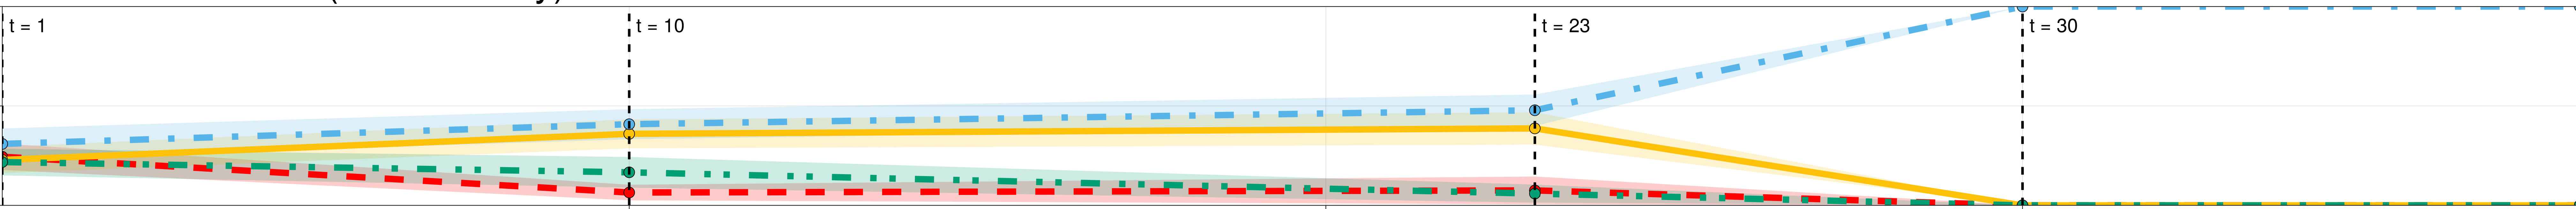

Model Inferences (Actions Only)

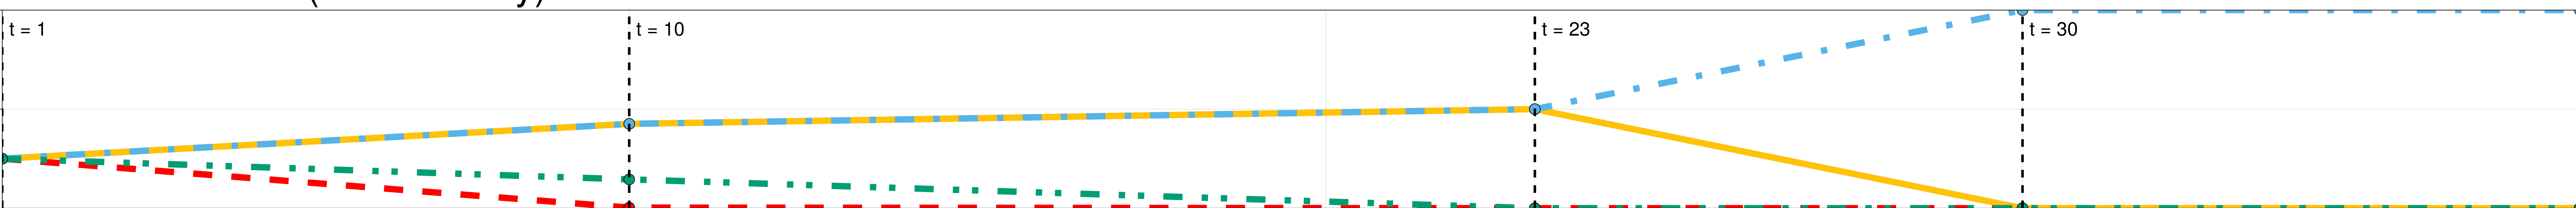

Supplement: supplementary_material [file attachment]
