# Supplementary material
Source: ML conference proceedings conference paper supplement (https://openreview.net/forum?id=TBWhdZUOwO)

# Environment 5: Goal 2

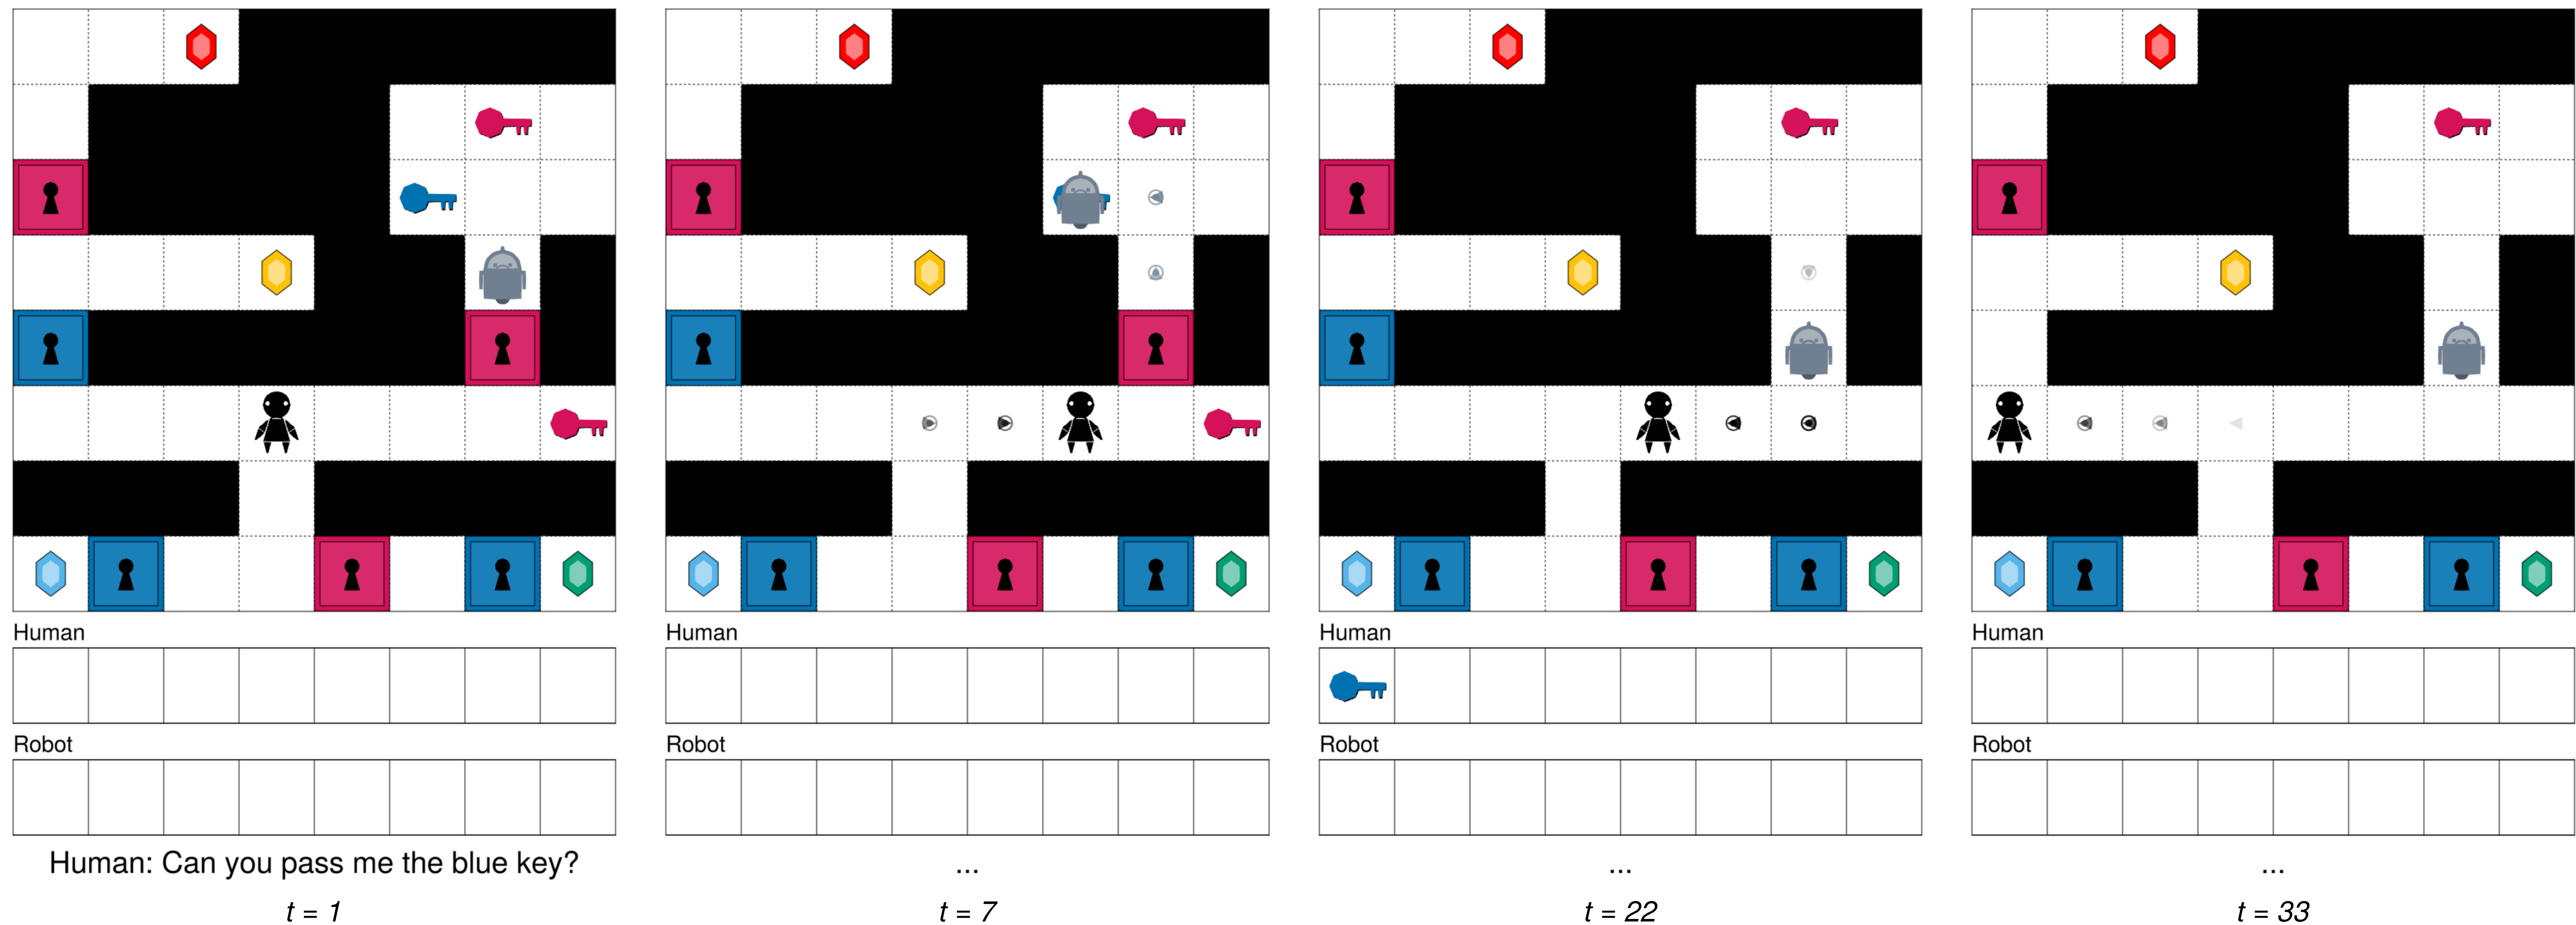

## Human Inferences (Actions & Instructions)

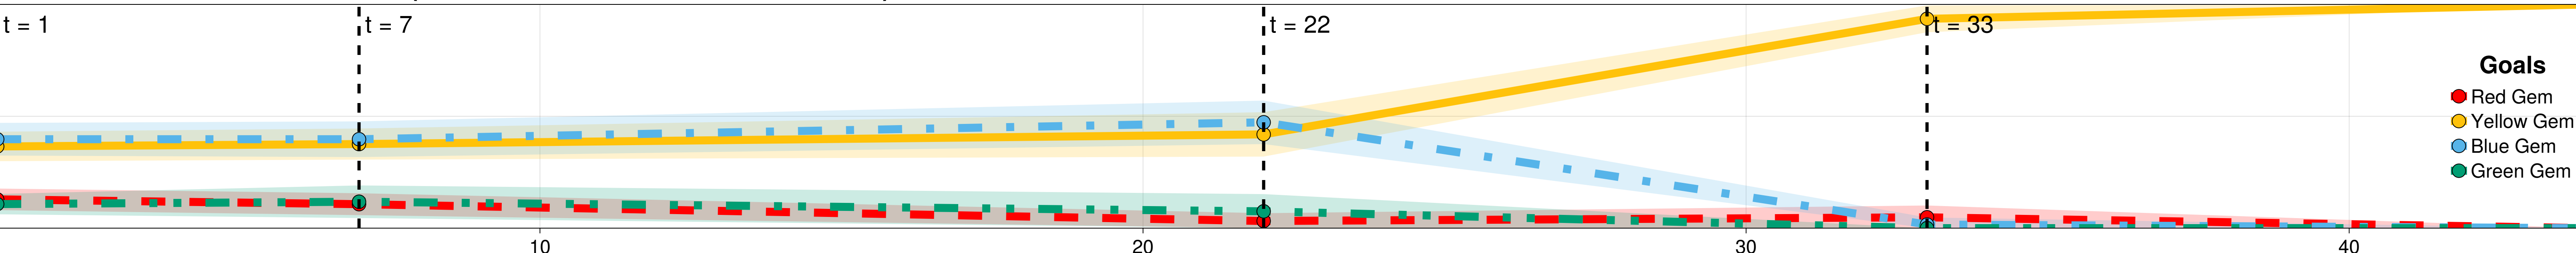

## Model Inferences (Actions & Instructions)

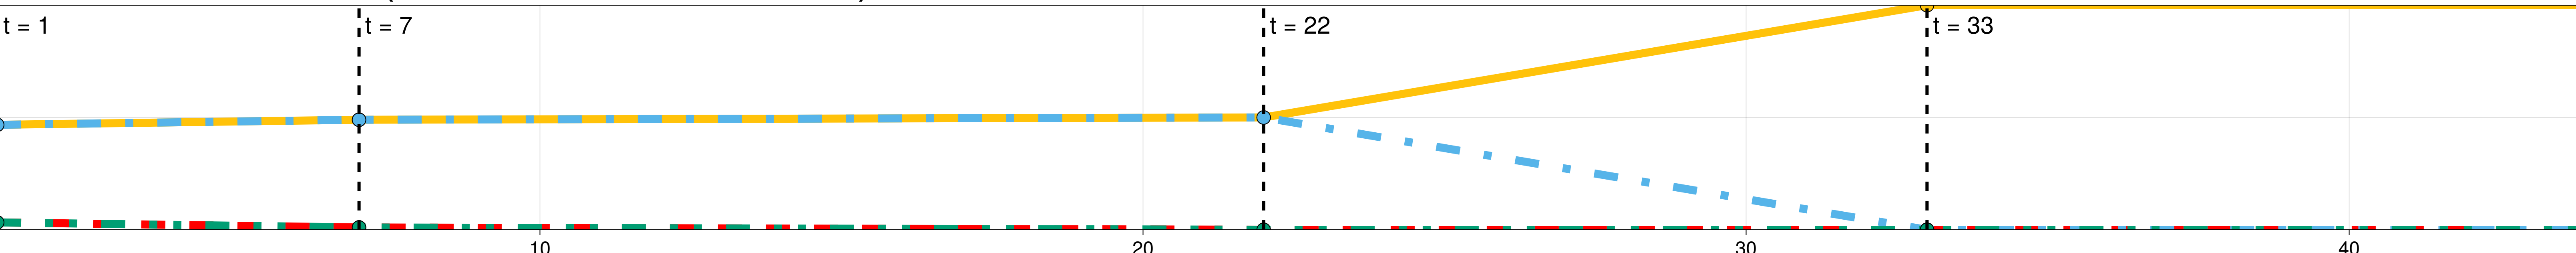

## Human Inferences (Actions Only)

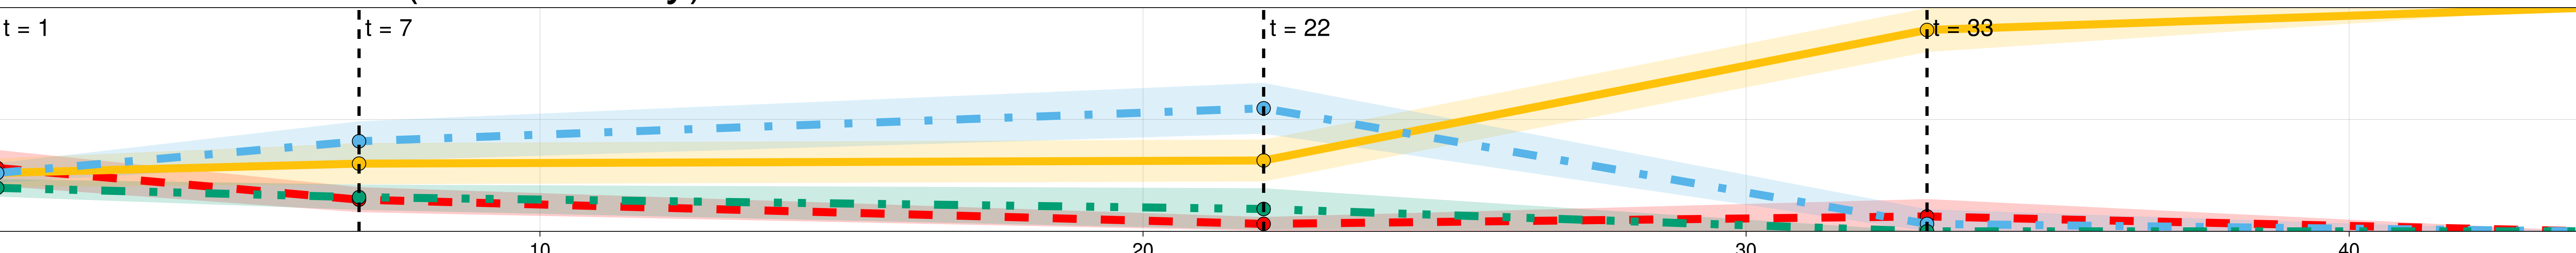

## Model Inferences (Actions Only)

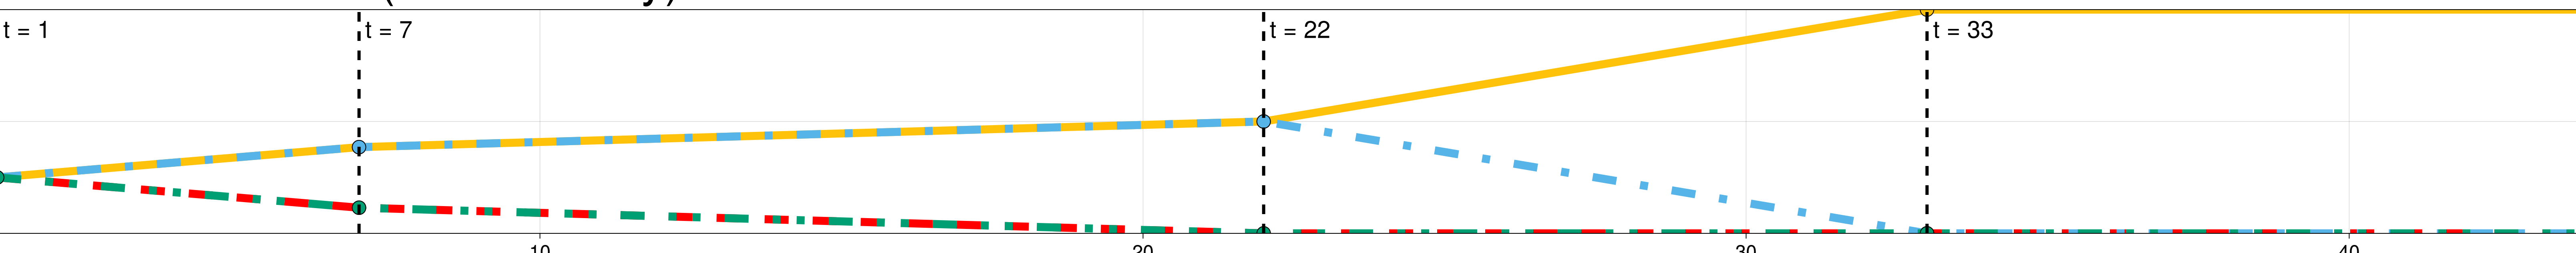

Supplement: supplementary_material [file attachment]
