# Supplementary material
Source: ML conference proceedings conference paper supplement (https://openreview.net/forum?id=TBWhdZUOwO)
Supplement: supplementary_material [file attachment]

Environment 4: Goal 1

Human

|  |  |  |  |  |  |  |  |
|--|--|--|--|--|--|--|--|
|  |  |  |  |  |  |  |  |
|--|--|--|--|--|--|--|--|

Robot

|  |  |  |  |  |  |  |  |
|--|--|--|--|--|--|--|--|
|  |  |  |  |  |  |  |  |
|--|--|--|--|--|--|--|--|

$t = 1$

Human

|  |  |  |  |  |  |  |  |
|--|--|--|--|--|--|--|--|
|  |  |  |  |  |  |  |  |
|--|--|--|--|--|--|--|--|

Robot

|   |  |  |  |  |  |  |  |
|---|--|--|--|--|--|--|--|
| 🔑 |  |  |  |  |  |  |  |
|---|--|--|--|--|--|--|--|

...

$t = 16$

Human

|   |  |  |  |  |  |  |  |
|---|--|--|--|--|--|--|--|
| 🔑 |  |  |  |  |  |  |  |
|---|--|--|--|--|--|--|--|

Robot

|  |  |  |  |  |  |  |  |
|--|--|--|--|--|--|--|--|
|  |  |  |  |  |  |  |  |
|--|--|--|--|--|--|--|--|

...

$t = 31$

Human

|   |  |  |  |  |  |  |  |
|---|--|--|--|--|--|--|--|
| 🔑 |  |  |  |  |  |  |  |
|---|--|--|--|--|--|--|--|

Robot

|  |  |  |  |  |  |  |  |
|--|--|--|--|--|--|--|--|
|  |  |  |  |  |  |  |  |
|--|--|--|--|--|--|--|--|

...

$t = 40$

Environment 4: Goal 2

Human

|  |  |  |  |  |  |  |  |
|--|--|--|--|--|--|--|--|
|  |  |  |  |  |  |  |  |
|--|--|--|--|--|--|--|--|

Robot

|  |  |  |  |  |  |  |  |
|--|--|--|--|--|--|--|--|
|  |  |  |  |  |  |  |  |
|--|--|--|--|--|--|--|--|

$t = 1$

Human

|  |  |  |  |  |  |  |  |
|--|--|--|--|--|--|--|--|
|  |  |  |  |  |  |  |  |
|--|--|--|--|--|--|--|--|

Robot

|   |  |  |  |  |  |  |  |
|---|--|--|--|--|--|--|--|
| 🔑 |  |  |  |  |  |  |  |
|---|--|--|--|--|--|--|--|

...

$t = 18$

Human

|   |  |  |  |  |  |  |  |
|---|--|--|--|--|--|--|--|
| 🔑 |  |  |  |  |  |  |  |
|---|--|--|--|--|--|--|--|

Robot

|  |  |  |  |  |  |  |  |
|--|--|--|--|--|--|--|--|
|  |  |  |  |  |  |  |  |
|--|--|--|--|--|--|--|--|

...

$t = 35$

Human

|   |  |  |  |  |  |  |  |
|---|--|--|--|--|--|--|--|
| 🔑 |  |  |  |  |  |  |  |
|---|--|--|--|--|--|--|--|

Robot

|  |  |  |  |  |  |  |  |
|--|--|--|--|--|--|--|--|
|  |  |  |  |  |  |  |  |
|--|--|--|--|--|--|--|--|

...

$t = 44$

Environment 4: Goal 3

Human

|  |  |  |  |  |  |  |  |
|--|--|--|--|--|--|--|--|
|  |  |  |  |  |  |  |  |
|--|--|--|--|--|--|--|--|

Robot

|  |  |  |  |  |  |  |  |
|--|--|--|--|--|--|--|--|
|  |  |  |  |  |  |  |  |
|--|--|--|--|--|--|--|--|

$t = 1$

Human

|  |  |  |  |  |  |  |  |
|--|--|--|--|--|--|--|--|
|  |  |  |  |  |  |  |  |
|--|--|--|--|--|--|--|--|

Robot

|  |  |  |  |  |  |  |  |
|--|--|--|--|--|--|--|--|
|  |  |  |  |  |  |  |  |
|--|--|--|--|--|--|--|--|

...

$t = 16$

Human

|  |  |  |  |  |  |  |  |
|--|--|--|--|--|--|--|--|
|  |  |  |  |  |  |  |  |
|--|--|--|--|--|--|--|--|

Robot

|   |   |  |  |  |  |  |  |
|---|---|--|--|--|--|--|--|
| 🔑 | 🔑 |  |  |  |  |  |  |
|---|---|--|--|--|--|--|--|

...

$t = 30$

Human

|   |  |  |  |  |  |  |  |
|---|--|--|--|--|--|--|--|
| 🔑 |  |  |  |  |  |  |  |
|---|--|--|--|--|--|--|--|

Robot

|   |  |  |  |  |  |  |  |
|---|--|--|--|--|--|--|--|
| 🔑 |  |  |  |  |  |  |  |
|---|--|--|--|--|--|--|--|

...

$t = 38$

Environment 4: Goal 4

Human

|  |  |  |  |  |  |  |  |
|--|--|--|--|--|--|--|--|
|  |  |  |  |  |  |  |  |
|--|--|--|--|--|--|--|--|

Robot

|  |  |  |  |  |  |  |  |
|--|--|--|--|--|--|--|--|
|  |  |  |  |  |  |  |  |
|--|--|--|--|--|--|--|--|

$t = 1$

Human

|  |  |  |  |  |  |  |  |
|--|--|--|--|--|--|--|--|
|  |  |  |  |  |  |  |  |
|--|--|--|--|--|--|--|--|

Robot

|   |  |  |  |  |  |  |  |
|---|--|--|--|--|--|--|--|
| 🔑 |  |  |  |  |  |  |  |
|---|--|--|--|--|--|--|--|

...

$t = 16$

Human

|  |  |  |  |  |  |  |  |
|--|--|--|--|--|--|--|--|
|  |  |  |  |  |  |  |  |
|--|--|--|--|--|--|--|--|

Robot

|   |  |  |  |  |  |  |  |
|---|--|--|--|--|--|--|--|
| 🔑 |  |  |  |  |  |  |  |
|---|--|--|--|--|--|--|--|

...

$t = 30$

Human

|   |  |  |  |  |  |  |  |
|---|--|--|--|--|--|--|--|
| 🔑 |  |  |  |  |  |  |  |
|---|--|--|--|--|--|--|--|

Robot

|  |  |  |  |  |  |  |  |
|--|--|--|--|--|--|--|--|
|  |  |  |  |  |  |  |  |
|--|--|--|--|--|--|--|--|

...

$t = 40$
