# Supplementary material
Source: ML conference proceedings conference paper supplement (https://openreview.net/forum?id=TBWhdZUOwO)

## Environment 6: Goal 3

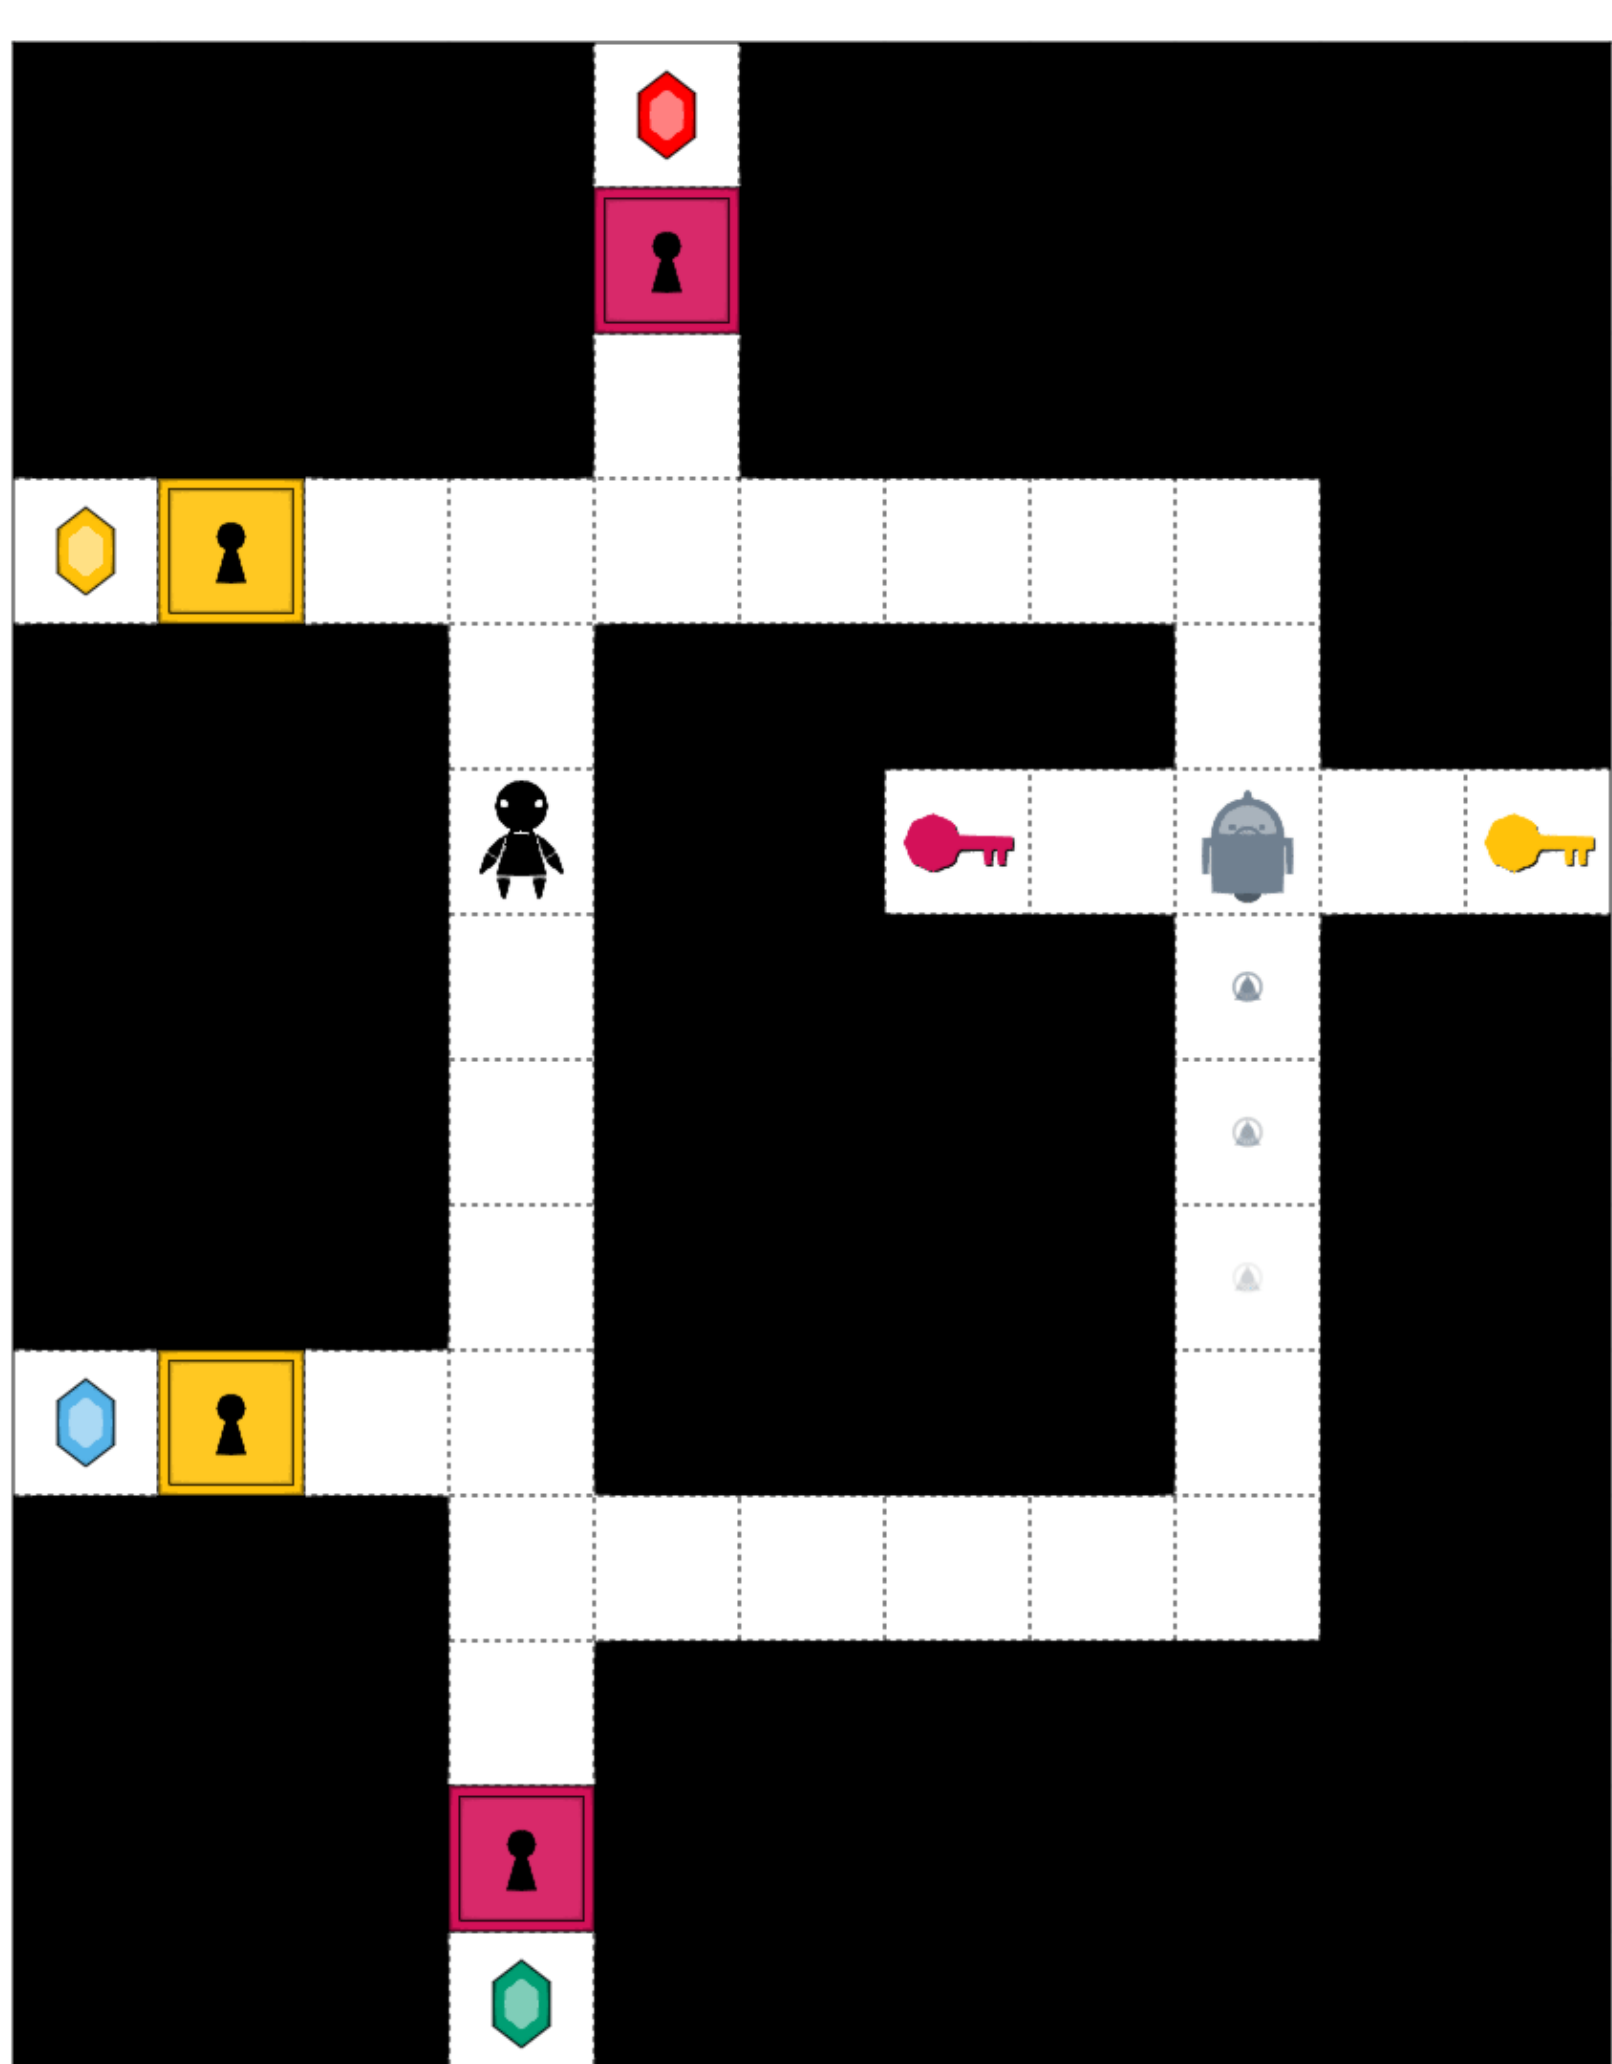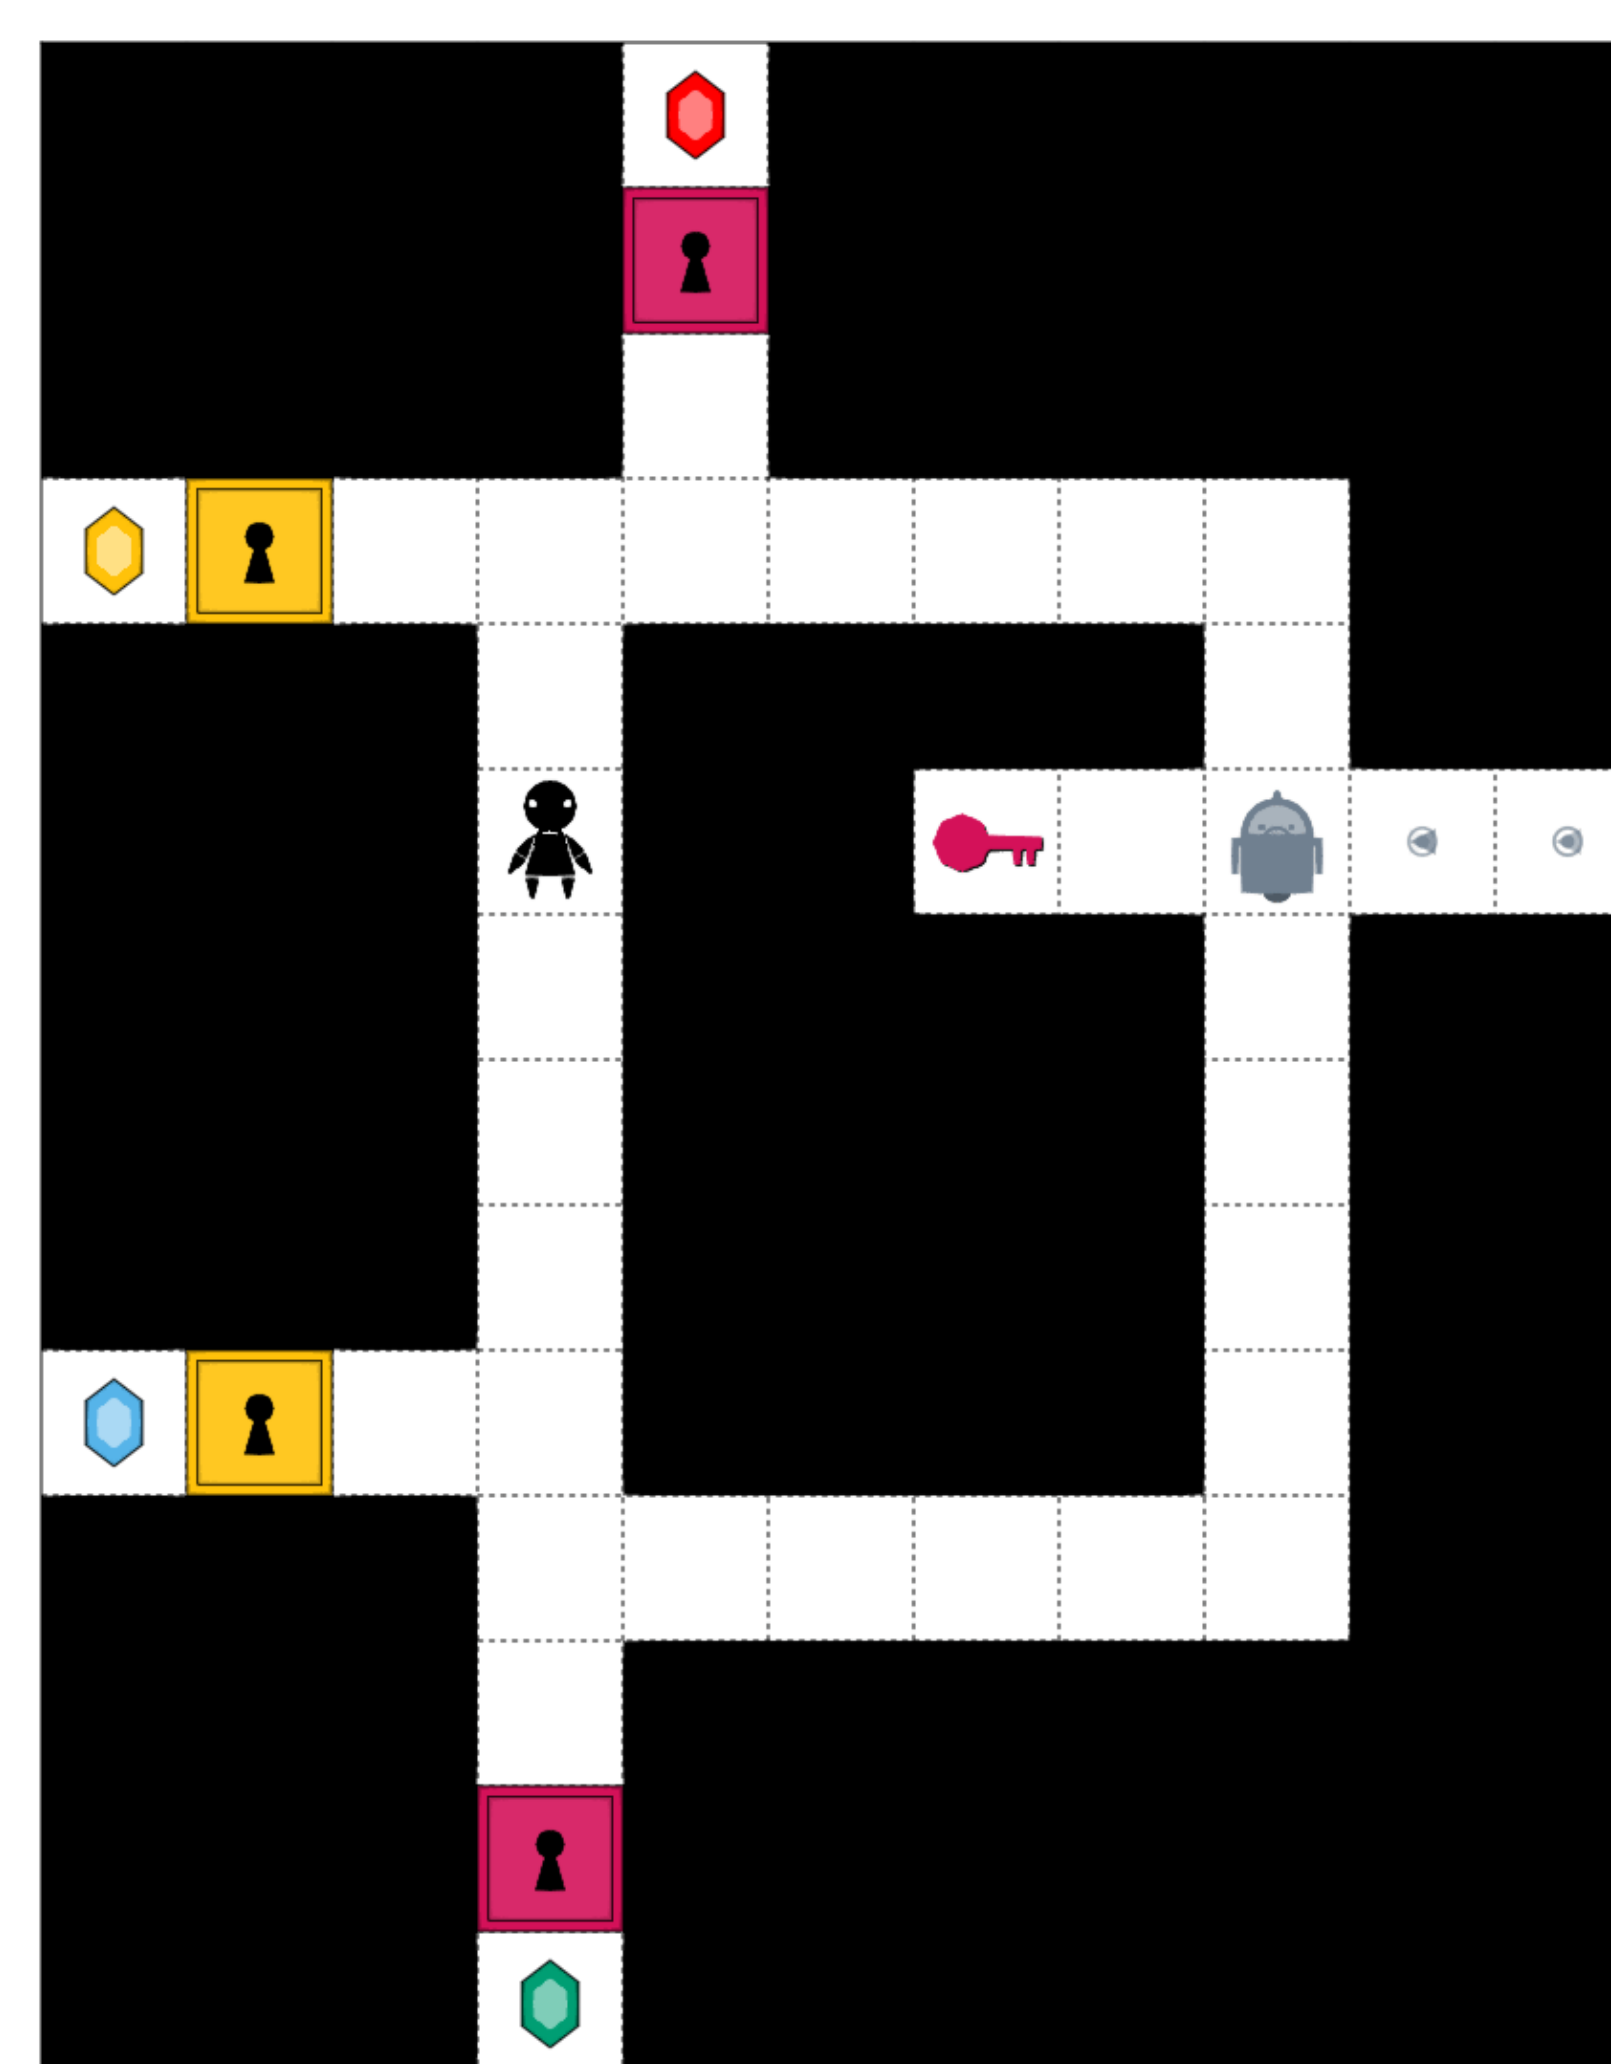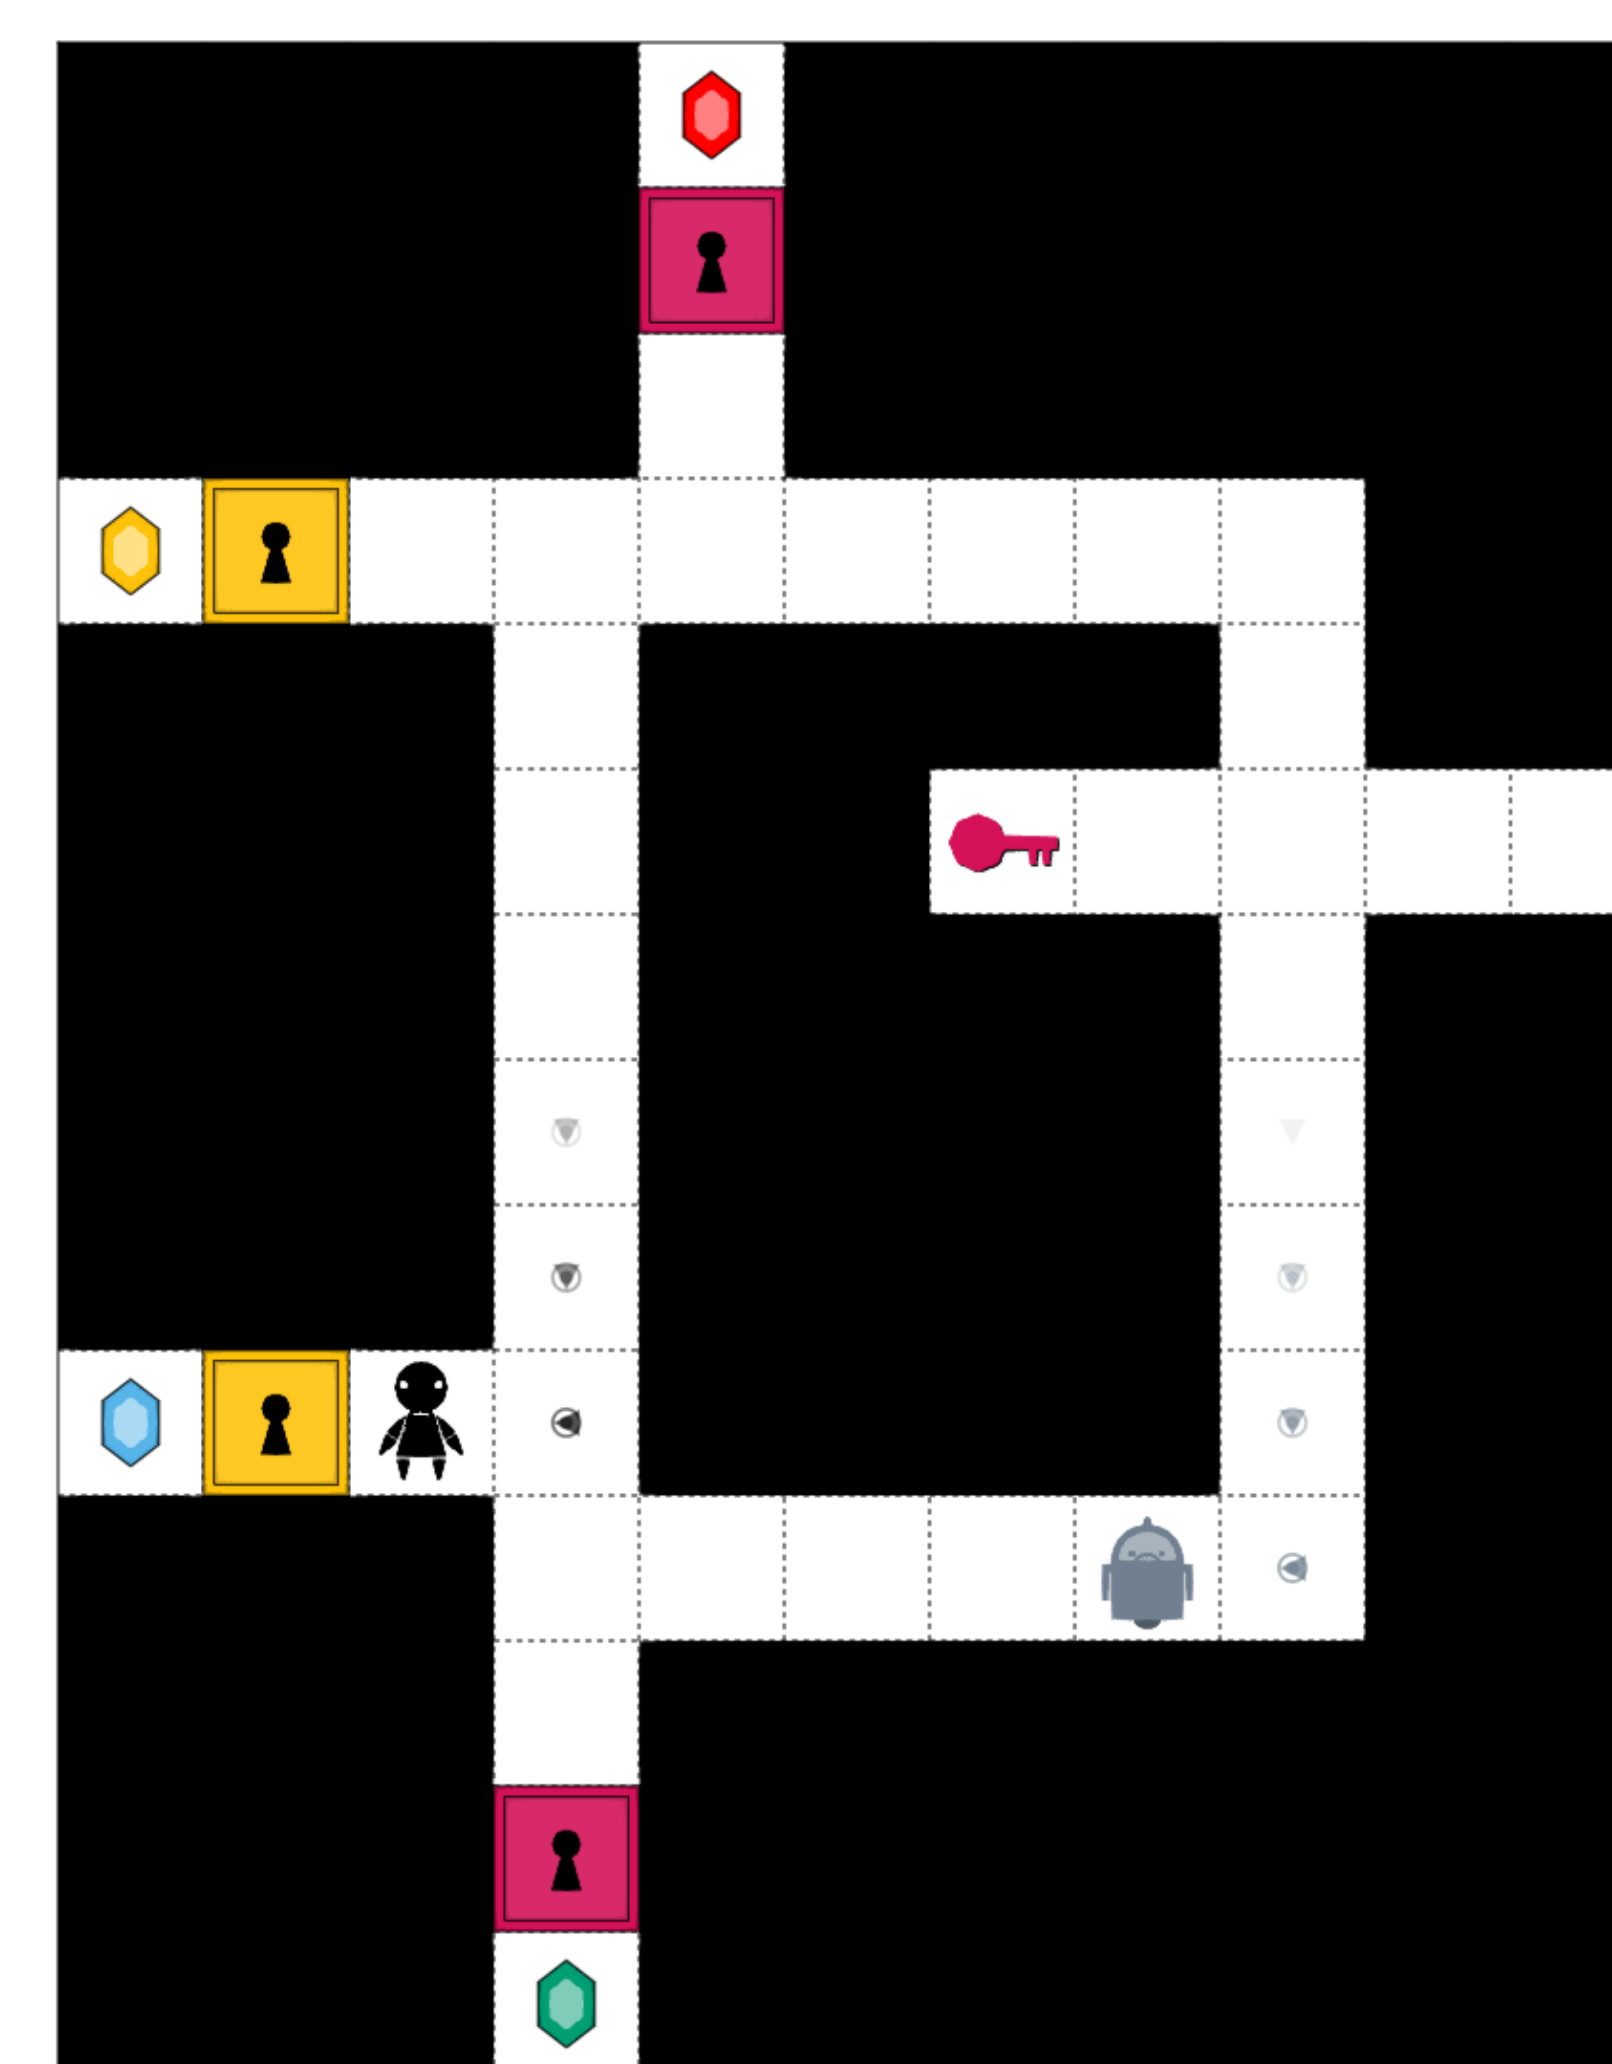[illegible]

| Human |  |  |  |  |  |  |  |
|-------|--|--|--|--|--|--|--|
|       |  |  |  |  |  |  |  |

  

| Robot                                                                               |  |  |  |  |  |  |  |
|-------------------------------------------------------------------------------------|--|--|--|--|--|--|--|
|  |  |  |  |  |  |  |  |

| Human |  |  |  |  |  |  |  |  |
|-------|--|--|--|--|--|--|--|--|
|       |  |  |  |  |  |  |  |  |

  

| Robot                                                                               |  |  |  |  |  |  |  |  |
|-------------------------------------------------------------------------------------|--|--|--|--|--|--|--|--|
|  |  |  |  |  |  |  |  |  |

...

...

...

$$t = 1$$
 $t = 8$  $t = 18$  $t = 30$ 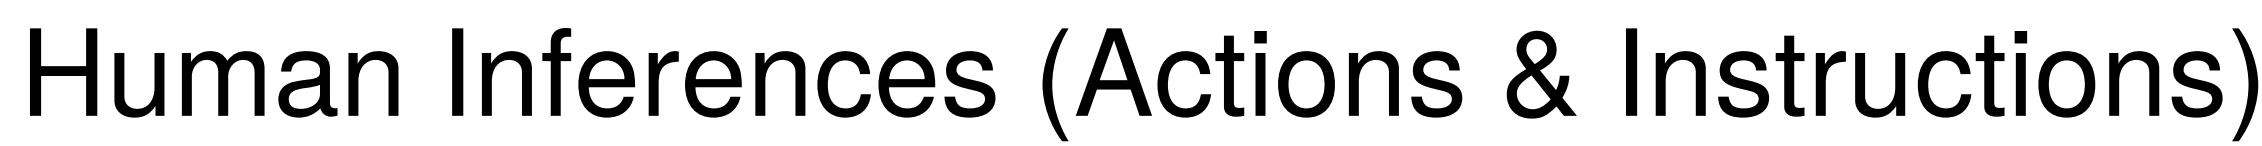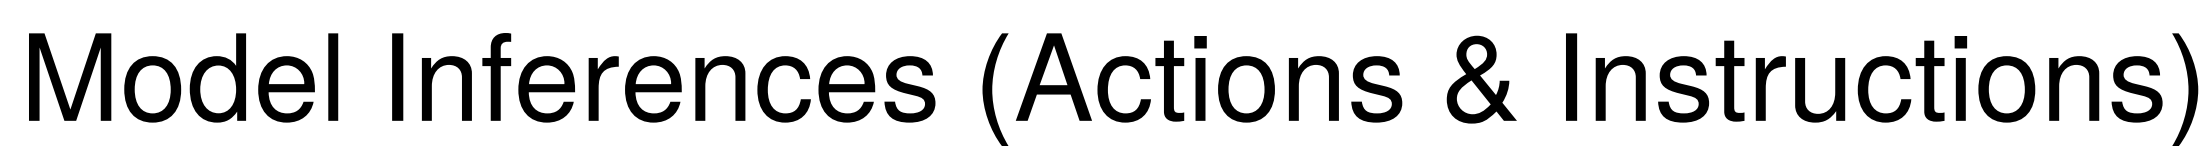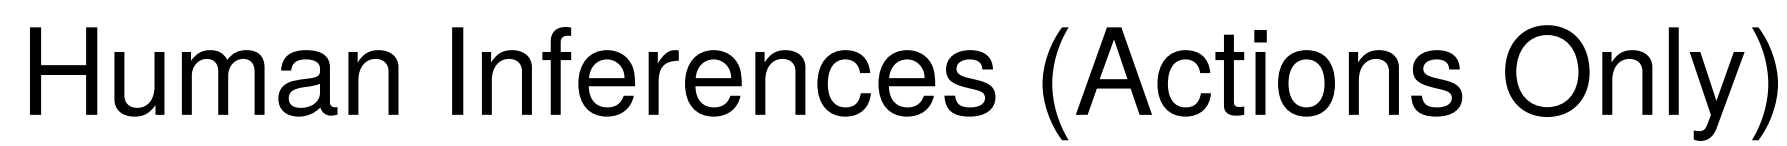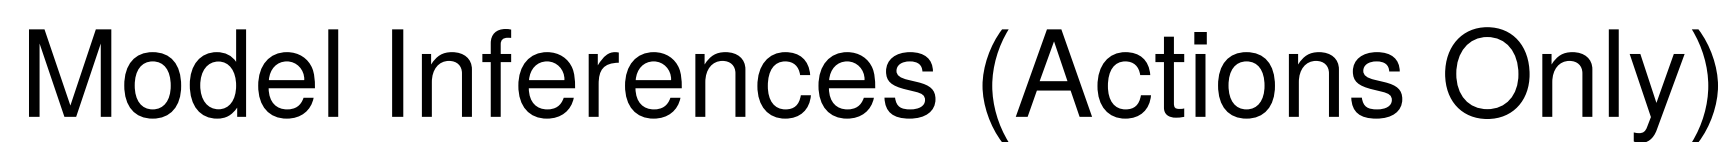

Time

Supplement: supplementary_material [file attachment]
